# Supplementary material for: A new method for early cancer detection based on platelet transcriptomics will have low positive predictive value
Source: publisher site journal article supplement (doi:10.1515/cclm-2022-1025), 2022-12-02
Supplement: Supplementary file 1 [file j_cclm-2022-1025_suppl.docx]

Letter to the Editor, CCLM

**A new method for early cancer detection based on platelet transcriptomics will have low positive predictive value**

**Keywords:** cancer screening, educated platelets, predictive value

Dear editor,

In 't Veld et al published recently in a prominent cancer journal a new method for cancer detection and localization (1). The basic principle of this method was published a few years back. I here would like to comment that the described test will likely not work for the intended application, as I will exemplify below. There is currently tremendous interest on early cancer detection and screening, and many new companies, worth billions of dollars, have been created to address this unmet clinical need (2). Fortunately, the National Cancer Institute (NCI), embarked on large, independent validation studies to delineate if these new strategies work, in the context of the intended clinical use, and especially, in population screening (3). This $75 million 4-year study will initially enroll 24,000 asymptomatic individuals, starting in 2023-2024.These results are highly anticipated.

Before I critique the above paper, I will provide some necessary definitions. Please keep in mind that apart from a good test, other prerequisites must be met before screening for any disease is considered. For example, the cost of screening should be societally acceptable. One cheap and effective toll is fetal occult blood for colon cancer screening. For details, see the well-established principles of screening by Wilson and Jungner (4).

Definitions: The sensitivity of a diagnostic test represents its ability to detect patients in the patient group, and is usually expressed as a percentage. For example, 99% sensitivity means that the test can detect (in other words, is positive) in 99 out of 100 patients. The specificity of a test refers to the percentage of non-diseased individuals (controls) who are negative for the test. The prevalence of the disease represents how common the disease is, among the screened population. In this commentary, I will use a 1% prevalence of all cancers in the screened population, as an illustrative, but realistic value.

True positives (TP) are the number of patients who are positive for the test. True negatives (TN) are the number of controls (non-diseased individuals) who are negative for the test. False positives (FP) are the number of controls who are positive for the test and false negatives (FN) are the number of patients who are negative for the test. Another two important variables in screening are the positive and negative predictive value of the test (PPV and NPV). PPV represents the chances that somebody has the disease if the test is positive, and the NPV represents the chances of somebody not having the disease, if the test is negative. In the case of cancer screening, the most important parameter to consider is the test’s PPV, which is calculated as the ratio of true positives (TP) divided by all positives (true positives + false positives) and is expressed as a percentage. We stressed the importance of the PPV, as it applies to cancer screening, in our previous communication (5). In order for a cancer screening test to be useful, the PPV, in general, should be as high as possible, preferably well over 50%. By definition, if the prevalence of the disease in the screening population is 1%, it means that the pre-test probability of somebody having cancer is equal to the prevalence (1%).

With these definitions in mind, I will use the best-case scenario for the sensitivity and specificity mentioned in the paper by In ‘t Veld et.al, and the worst (most realistic) case scenario, to derive the PPV of their new diagnostic test for cancer.

Under the best-case scenario, the specificity of the test was quoted as 99% and the sensitivity as 75% for stage I-IV disease. If we assume that we will screen 100,000 individuals (prevalence of cancer is set to be 1%) with the proposed assay, the following results will be obtained. There we will be 99,000 non diseased and 1,000 diseased individuals. The test will provide 98,010 true negatives, 990 false positives, 750 true positives and 250 false negatives. With these numbers in mind, the PPV will be (750)/ (750+990) x100=43%. So, somebody with a positive test will be more likely (57%) to be false positive (not having cancer) than true positive (having cancer, 43%). Having, or not having, cancer after the test is done, will be close to tossing a coin.

The authors admit that under a more realistic screening scenario, which will include aging individuals with common, non-malignant conditions, their test’s specificity will be in the 78% range and the sensitivity will be in the 50 % range. Using the same example as above, but with the new values, the PPV will be (500)/ (500+21,780) x100=2.2%. In other words, if somebody who is screened, and his/her pre-test chance of having cancer is 1%, if the test comes positive, the chance of having cancer, will be increased to only 2.2%. For every 100 patients who test positive, only 2 will have cancer and 98 will not have cancer (false positives). Under these circumstances, the test will be highly unreliable and clinically not useful. Screening tests with low PPV could have value for enriching the screened population with diseased individuals, so that second or third tier tests could improve on the prediction. An example is cystic fibrosis screening.

It is evident from this analysis that any screening test for cancer, or other diseases with a relativity low prevalence in the population, will need to exhibit extremely high specificity, especially when the population includes patients with benign maladies, such as inflammatory diseases. Additionally, even if many cancer screening tests show seemingly impressive specificity and sensitivity, the most important parameter to consider in screening is the positive predictive value, which indicates what are the chances for a patient to have cancer if the test is positive. The expected large number of false positive results under a screening scenario necessitates additional interventions for these people, who may be harmed by the unnecessary follow-up. All these important caveats of screening have been analyzed by us elsewhere (6-9).

We conclude that although this high-profile paper (1) represents a very large and thorough study, the characteristics of the assay, as determined by the authors, are not sufficient for screening the general population. Simply, the large number of false positive results will confuse patients, who may be subjected to unnecessary follow-up and potentially costly and harmful interventions. The potential of screening to promote over-diagnosis and over-treatment has been addressed elsewhere (6, 8). These are precisely some of the reasons as to why very few cancer screening tests are available today and are recommended by guidelines from various organizations.

References:

1. In ’t Veld SGJG, Arkani M, Post E, et.al. Detection and localization of early- and late-stage cancers using platelet RNA. Cancer Cell, 2022, ISSN 1535-6108. https://doi.org/10.1016/j.ccell.2022.08.006.
2. Fernandez-Uriarte, A, Pons-Belda O.D, Diamandis EP. Cancer screening companies are rapidly proliferating: Are they ready for business? Cancer Epidemiol Biomarkers Prev. 2022; 31:1146-1150.
3. Anonymous. NCI to study cancer blood tests. Science 2022; 377: 8.
4. Wilson, J.M.G., Jungner, G. &World Health Organization. Principles and practice of screening for disease.1968. <https://apps.who.int/iris/handle/10665/37650>
5. Fiala C, Diamandis EP. A multi-cancer detection test: focus on the positive predictive value. Ann Oncol 2020; 31:1267-1268.
6. Fiala C, Diamandis EP. P4 medicine or O4 medicine? The perils of population wide, asymptomatic disease screening. Clin Biochem 2020; 77:62. doi: 10.1016/j.clinbiochem.2020.01.002.
7. Fiala C, Diamandis EP. Can a broad molecular screen based on circulating tumor DNA aid in early cancer detection? J Appl Lab Med 2020; 5:1372-1377.
8. Fiala C, Taher J, Diamandis EP. (2019). P4 Medicine or O4 Medicine? Hippocrates provides the answer. J Appl Lab Med.2019; 4:108-119.
9. Duffy MJ, Diamandis EP, Crown J. Circulating tumor DNA (ctDNA) as a pan-cancer screening test: is it finally on the horizon? Clin Chem Lab Med. 2019; 59:1353-1361.
